# Supplementary material
Source: PubMed Central journal article supplement (PMC5555636)
Supplement: NIHMS814730-supplement-1.pdf [file NIHMS814730-supplement-1.pdf]

**Supplemental Table 1. Flow cytometry antibodies used in this study**

| Antibody          | Clone       | Company        |
|-------------------|-------------|----------------|
| <i>Anti-mouse</i> |             |                |
| CD11b             | M1/70       | eBioscience    |
| CD11c             | N418        | eBioscience    |
| CD45.2            | 104         | eBioscience    |
| CD45.1            | A20         | eBioscience    |
| CD64              | X54-5/7.1   | BD Biosciences |
| MHC I-A/I-E       | M5/114.15.2 | eBioscience    |
| F4/80             | BM8         | eBioscience    |
| CD206             | MR5D3       | AbD Serotec    |
| Siglec-F          | E50-2440    | BD Biosciences |
| Ly6G              | RB6-8C5     | eBioscience    |
| CD40              | 1C10        | eBioscience    |
| CD80              | 16-10A1     | eBioscience    |
| CD86              | GL1         | eBioscience    |
| CD103             | 2E7         | eBioscience    |
| CD4               | RM4-5       | eBioscience    |
| CD8a              | 53-6.7      | eBioscience    |
| B220              | RA3-6B2     | eBioscience    |
| CD115             | AFS98       | eBioscience    |
| Ly6C              | AL21        | BD Biosciences |
| <i>Anti-human</i> |             |                |
| CD206             | 15-2        | Biolegend      |
| CD11c             | 3.9         | Biolegend      |
| CD11b             | 44          | BD Biosciences |
| CD14              | RMO52       | Beckman        |
| CD45              | HI30        | eBioscience    |
| CD1c              | F10/21A3    | BD Bioscience  |
| CD64              | 10.1        | eBioscience    |

**Supplemental Table 2. Sequences for RT-PCR primers used in this study**

| Gene          | Primer  | Sequence                       |
|---------------|---------|--------------------------------|
| <i>Arbp</i>   | Forward | AGA TTC GGG ATA TGC TGT TGG C  |
|               | Reverse | TCG GGT CCT AGA CCA GTG TTC    |
| <i>18S</i>    | Forward | TTG ACG GAA GGG CAC CAC CAG    |
|               | Reverse | GCA CCA CCA CCC ACG GAA TCG    |
| <i>Flt3</i>   | Forward | GAG CGA CTC CAG CTA CGT C      |
|               | Reverse | ACC CAG TGA AAA TAT CTC CCA GA |
| <i>Mertk</i>  | Forward | CAG GGC CTT TAC CAG GGA GA     |
|               | Reverse | TGT GTG CTG GAT GTG ATC TTC    |
| <i>Camk1</i>  | Forward | AAG CAG GCG GAA GAC ATT AGG    |
|               | Reverse | AGT TTC TGA GTC CTC TTG TCC T  |
| <i>Zbtb46</i> | Forward | AGA GAG CAC ATG AAG CGA CA     |
|               | Reverse | CTG GCT GCA GAC ATG AAC AC     |
| <i>Fcgr1</i>  | Forward | AGG TTC CTC AAT GCC AAG TGA    |
|               | Reverse | GCG ACC TCC GAA TCT GAA GA     |
| <i>kit</i>    | Forward | GCC ACG TCT CAG CCA TCT G      |
|               | Reverse | GTC GCC AGC TTC AAC TAT TAA CT |
| <i>Ccr7</i>   | Forward | TGT ACG AGT CGG TGT GCT TC     |
|               | Reverse | GGT AGG TAT CCG TCA TGG TCT TG |
| <i>itgax</i>  | Forward | CTG GAT AGC CTT TCT TCT GCT G  |
|               | Reverse | GCA CAC TGT GTC CGA ACT C      |
| <i>Ccl2</i>   | Forward | TTA AAA ACC TGG ATC GGA ACC AA |
|               | Reverse | GCA TTA GCT TCA GAT TTA CGG GT |
| <i>Il6</i>    | Forward | TAG TCC TTC CTA CCC CAA TTT CC |
|               | Reverse | TTG GTC CTT AGC CAC TCC TTC    |
| <i>Ifng</i>   | Forward | ATG AAC GCT ACA CAC TGC ATC    |
|               | Reverse | CCA TCC TTT TGC CAG TTC CTC    |
| <i>Foxp3</i>  | Forward | CCC ATC CCC AGG AGT CTT G      |
|               | Reverse | ACC ATG ACT AGG GGC ACT GTA    |
